# Supplementary material
Source: PubMed Central journal article supplement (PMC3237817)
Supplement: NIHMS337040-supplement-supplementary.pdf [file NIHMS337040-supplement-supplementary.pdf]

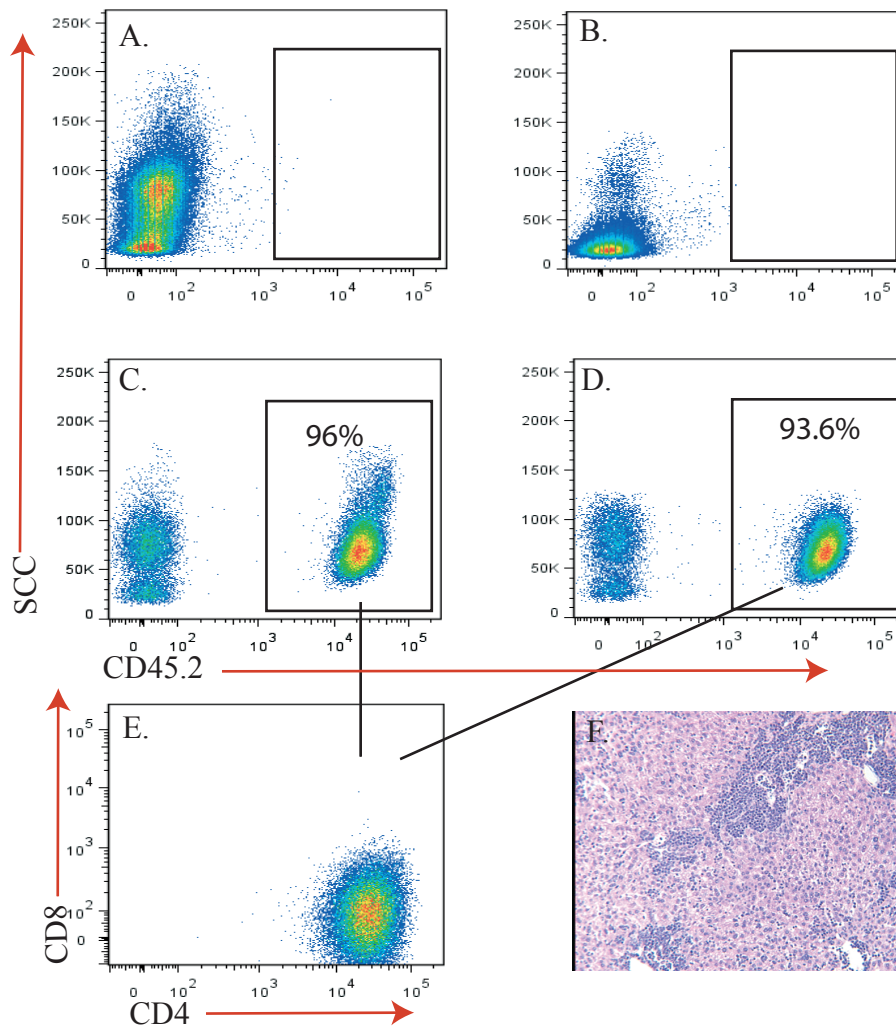

**Supplementary Data 1. Lymphocytes isolated from  $Cre^+Pten^{fx/fx}/Myc^{fx/fx}$  LPDs mice failed to engraft to hematopoietic tissues in recipient mice, whereas lymphoblasts from  $Cre^+Pten^{fx/fx}/Myc^{fx/+}$  mice with lymphoma generated a leukemia-like disease with lymphoblast infiltration into multiple tissues.** Lymphocytes and lymphoblasts were isolated from the enlarged lymph nodes of  $Cre^+Pten^{fx/fx}/Myc^{fx/fx}$  mice with LPDs and  $Cre^+Pten^{fx/fx}/Myc^{fx/+}$  mice with lymphoma. Cells were transplanted into lethally- irradiated recipient mice separately. Ten million  $Cre^+Pten^{fx/fx}/Myc^{fx/fx}$  LPD lymphocytes (CD45.2<sup>+</sup>) or one million  $Cre^+Pten^{fx/fx}/Myc^{fx/+}$  lymphoblasts (CD45.2<sup>+</sup>) were transplanted into each recipient mouse together with  $2 \times 10^5$  WT supporting BM cells (CD45.1<sup>+</sup>). Eight mice were transplanted in each group. Mice receiving  $Cre^+Pten^{fx/fx}/Myc^{fx/fx}$  LPD lymphocytes survived for more than 6 months. No donor- derived cells (CD45.2<sup>+</sup>) could be detected in BM (A) and spleens (B) of recipient mice 6 months after transplantation, as shown by flow cytometric analysis of CD45.2<sup>+</sup> cells. However, all mice receiving  $Cre^+Pten^{fx/fx}/Myc^{fx/+}$  lymphoblasts died within 20 days after transplantation with a leukemia-like disease as shown by multiple tissue infiltration of CD4<sup>+</sup>CD8<sup>-</sup> lymphoblasts (C-F). C and D are representative flow data from BM (C) and spleen (D) of one such recipient mouse. F. A representative liver section shows lymphoblast infiltration of the liver tissue.

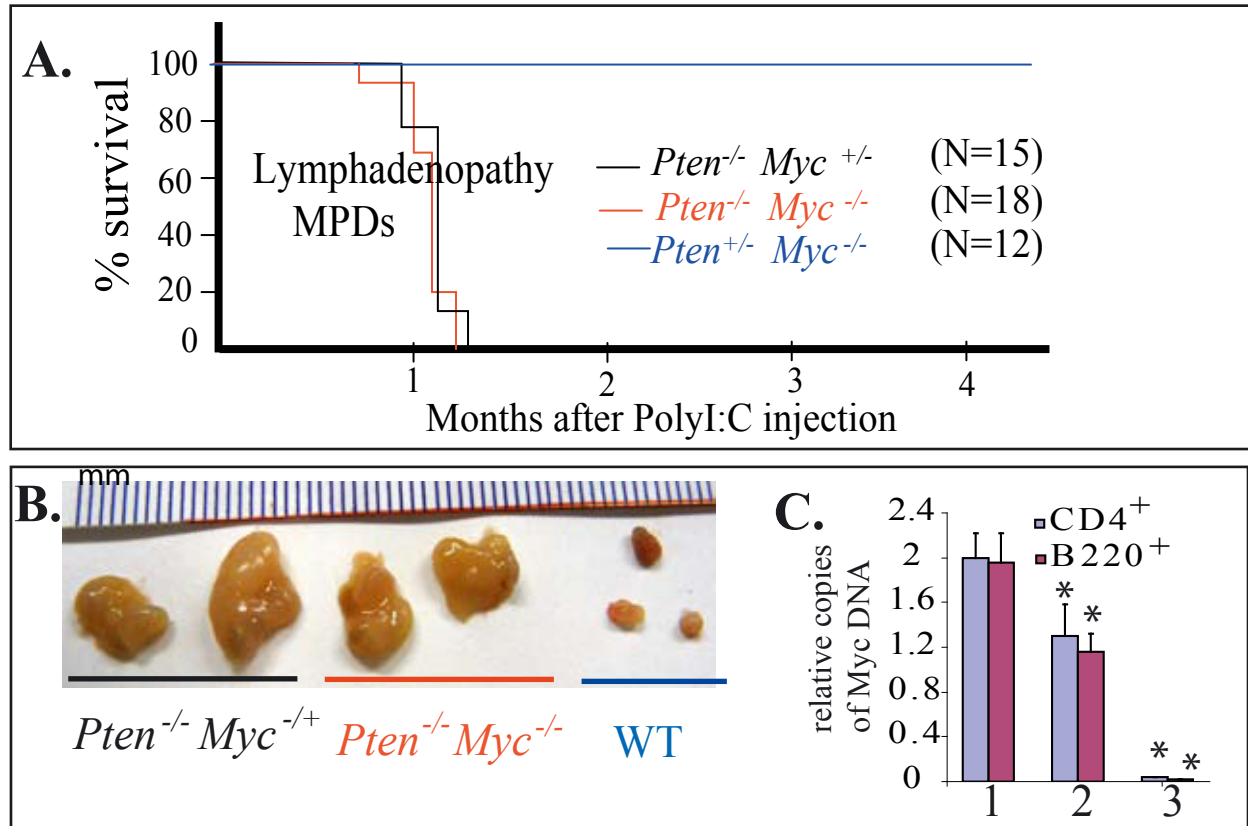

**Supplementary Data 2. A & B.** Three weeks after birth,  $Mx1Cre^+ Pten^{fx/fx} Myc^{fx/fx}$ ,  $Mx1Cre^+ Pten^{fx/fx} Myc^{fx/+}$ ,  $Mx1Cre^+ Pten^{fx/+} Myc^{fx/fx}$ , and WT littermate control mice were injected with 200ug. polyI:C every other day for a total of 5 injections to induce gene deletions. All  $Mx1Cre^+ Pten^{fx/fx} Myc^{fx/fx}$  and  $Mx1Cre^+ Pten^{fx/fx} Myc^{fx/+}$  mice developed lymphadenopathy 20 to 30 days after *Pten* and *Myc* gene deletions were induced. **C.** Heterozygous or homozygous *Myc* deletion in CD4<sup>+</sup> and B220<sup>+</sup> lymphocytes isolated from enlarged lymph nodes were confirmed by q-PCR assay. 1, 2 and 3 represent CD4<sup>+</sup> or B220<sup>+</sup> cells isolated from WT lymph nodes,  $Mx1Cre^+ Pten^{fx/fx} Myc^{fx/+}$  lymphadenopathy and  $Mx1Cre^+ Pten^{fx/fx} Myc^{fx/fx}$  lymphadenopathic mice, respectively

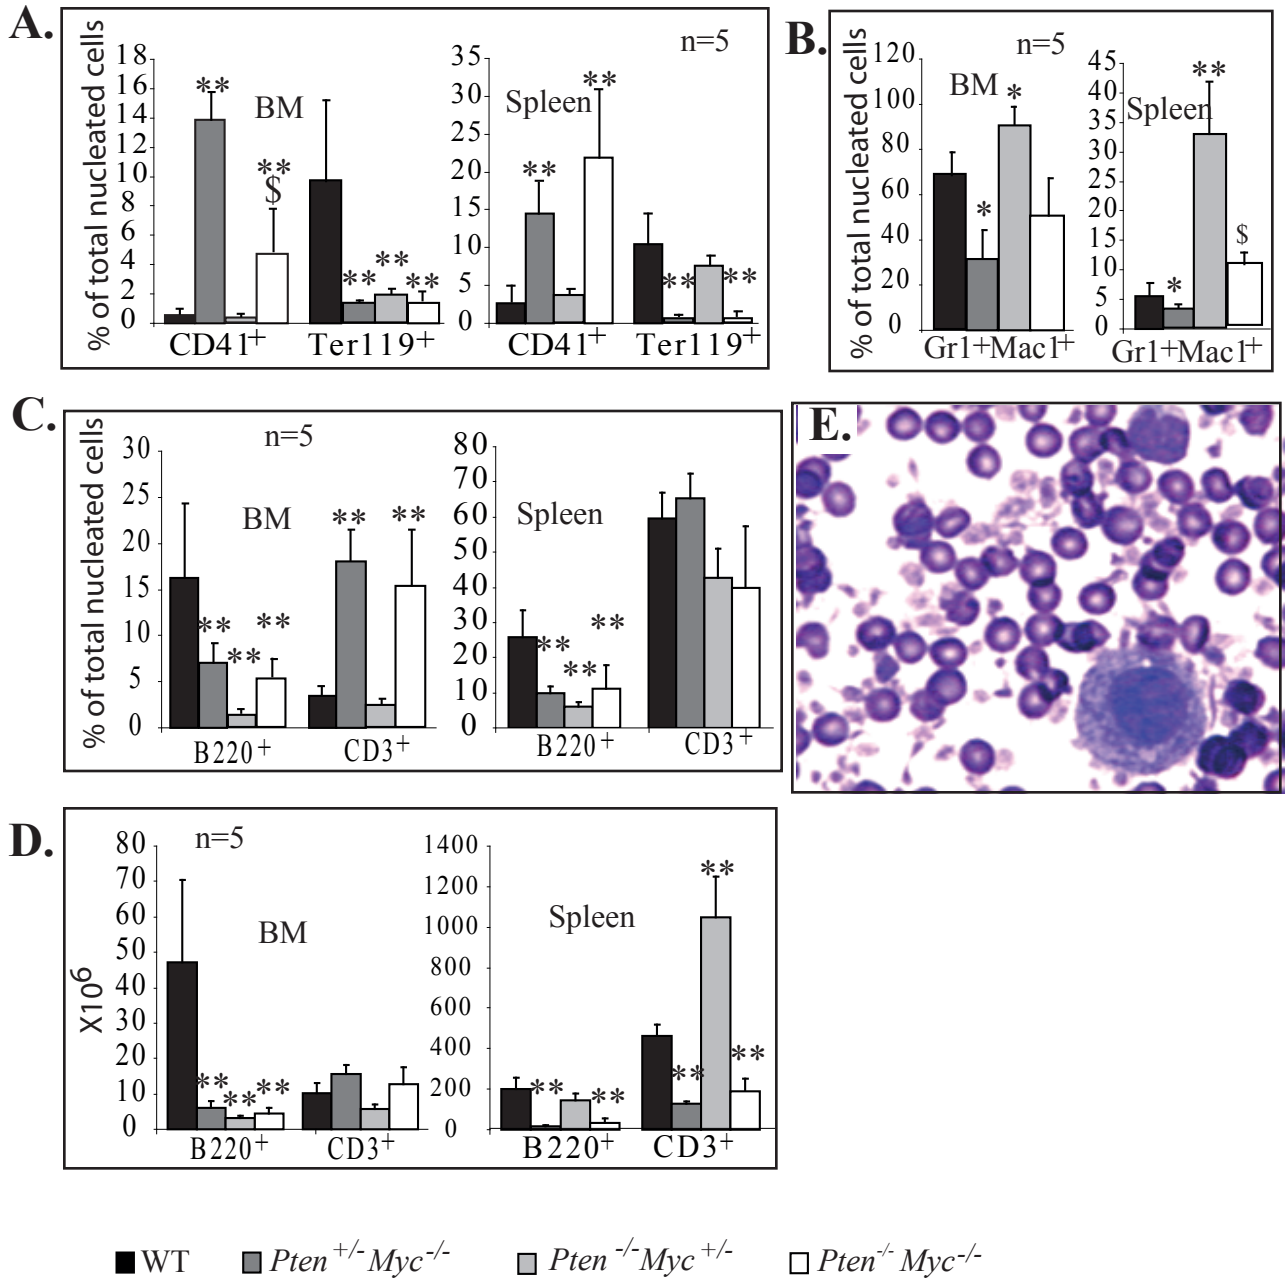

**Supplementary Data 3: General hematopoietic information for *Pten*<sup>-/-</sup>*Myc*<sup>-/-</sup> mice.**

**A.**

Reduction in the percentage of CD41<sup>+</sup> megakaryocytes in BM but increased percentage of these same cells in spleens of *Pten*<sup>-/-</sup>*Myc*<sup>-/-</sup> mice compared to *Pten*<sup>+/-</sup>*Myc*<sup>-/-</sup> mice. **B.** Slight increase in the percentage of Gr1<sup>+</sup>Mac1<sup>+</sup> granulocytes in spleens of *Pten*<sup>-/-</sup>*Myc*<sup>-/-</sup> mice compared to those of *Pten*<sup>+/-</sup>*Myc*<sup>-/-</sup> mice. **C.** Significant reduction in B220<sup>+</sup> B lymphocytes in BM and spleens of *Pten*<sup>-/-</sup>*Myc*<sup>-/-</sup> and *Pten*<sup>+/-</sup>*Myc*<sup>-/-</sup> mice. However the percentage of CD3<sup>+</sup> T-lymphocytes is significantly increased in BM but remains the same in spleens of *Pten*<sup>-/-</sup>*Myc*<sup>-/-</sup> and *Pten*<sup>+/-</sup>*Myc*<sup>-/-</sup> mice compared to WT control mice. The percentages of these two types of cells are comparable between *Pten*<sup>-/-</sup>*Myc*<sup>-/-</sup> and *Pten*<sup>+/-</sup>*Myc*<sup>-/-</sup> mice. **D.** Absolute numbers of B220<sup>+</sup> B-lymphocytes and CD3<sup>+</sup> T-lymphocytes are comparable between *Pten*<sup>-/-</sup>*Myc*<sup>-/-</sup> and *Pten*<sup>+/-</sup>*Myc*<sup>-/-</sup> mice. **E.** A few megakaryocytes are occasionally observed in the PB of *Pten*<sup>-/-</sup>*Myc*<sup>-/-</sup> mice. \*\* indicates statistical significance compared to WT mice. \$ indicates statistical significance compared to *Pten*<sup>-/-</sup>*Myc*<sup>+/-</sup> mice.

*Pten*<sup>-/-</sup>*Myc*<sup>+/-</sup>

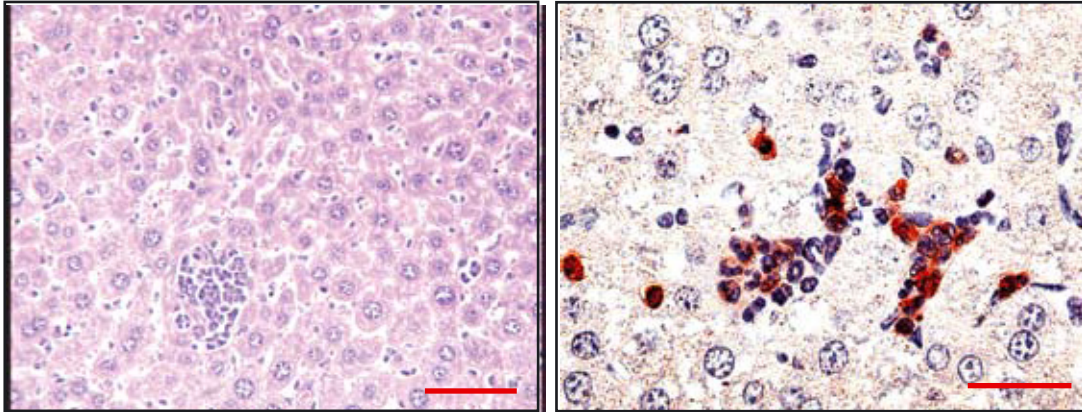

**Supplementary data 4. Granulocyte infiltration into livers of *Pten*<sup>-/-</sup>*Myc*<sup>+/-</sup> mice, as shown by Gr1 antibody staining. Bars in the figures equal 100  $\mu$ m.**



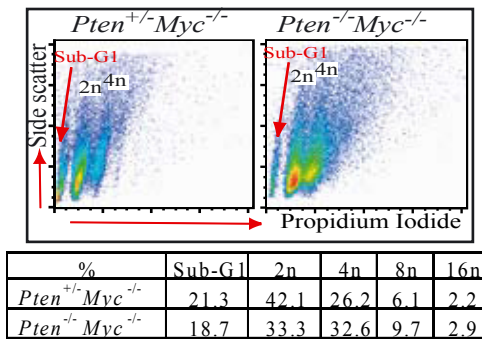

**Supplementary Data 5. *Pten* deletion did not reverse the lower ploidy and increased apoptosis phenotype of *Myc*<sup>-/-</sup> megakaryocytes.** PI staining and flow cytometric analysis of DNA content of CD41<sup>+</sup> megakaryocytes from *Pten*<sup>+/-</sup>*Myc*<sup>-/-</sup> and *Pten*<sup>-/-</sup>*Myc*<sup>-/-</sup> mice. Upper panel is representative flow cytometric data for three pairs of mouse analyses. The sub-G1 population consists of cells undergoing apoptosis.

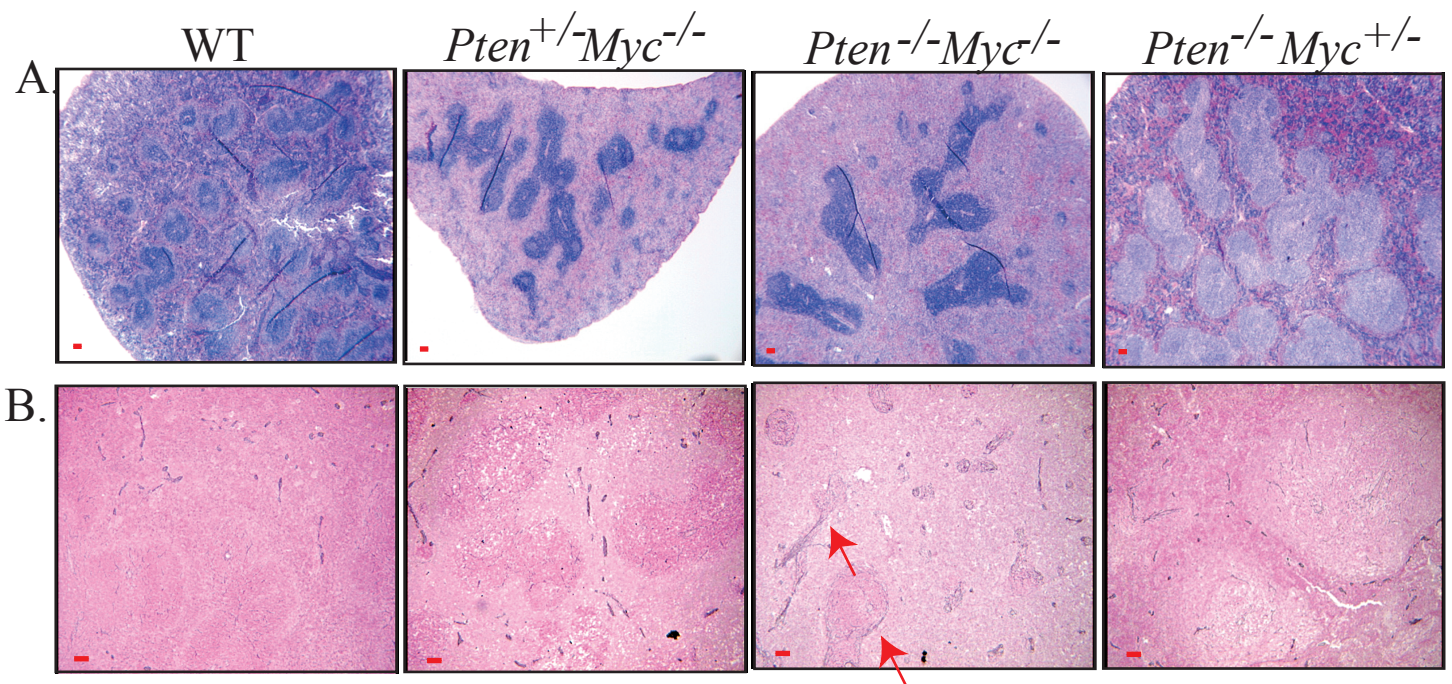

**Supplementary Data 6. Increased fibrosis in the spleens of *Pten*<sup>-/-</sup>*Myc*<sup>-/-</sup> mice.**

**A & B.**

Spleen sections of WT, *Pten*<sup>+/-</sup>*Myc*<sup>-/-</sup>, *Pten*<sup>-/-</sup>*Myc*<sup>-/-</sup> and *Pten*<sup>+/-</sup>*Myc*<sup>-/-</sup> mice stained with H & E (A) and reticulin (B). Increased fibrosis in *Pten*<sup>-/-</sup>*Myc*<sup>-/-</sup> mouse spleen is indicated by with arrows (B). Bars in the figures equal 100µm.

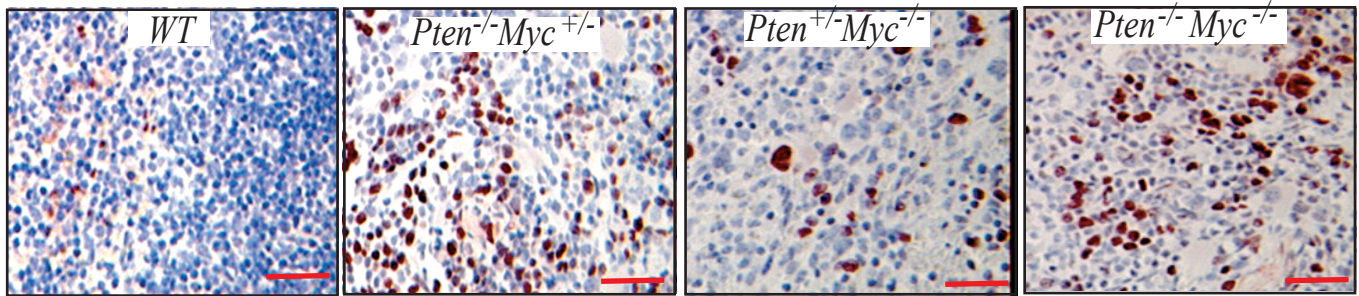

**Supplementary Data 7. Increased megakaryocytic proliferation in *Pten*<sup>-/-</sup>*Myc*<sup>-/-</sup> mice.**

Representative images of *in situ* BrdU staining of spleen sections from WT, *Pten*<sup>-/-</sup>*Myc*<sup>+/-</sup>, *Pten*<sup>+/-</sup>*Myc*<sup>-/-</sup> and *Pten*<sup>-/-</sup>*Myc*<sup>-/-</sup> mice. Significantly increased BrdU<sup>+</sup> cell percentage in spleens of *Pten*<sup>-/-</sup>*Myc*<sup>+/-</sup> and *Pten*<sup>-/-</sup>*Myc*<sup>-/-</sup> mice. The BrdU<sup>+</sup> cells in *Pten*<sup>+/-</sup>*Myc*<sup>-/-</sup> and *Pten*<sup>-/-</sup>*Myc*<sup>-/-</sup> mice are relatively larger in size, suggesting that they are megakaryocytes.

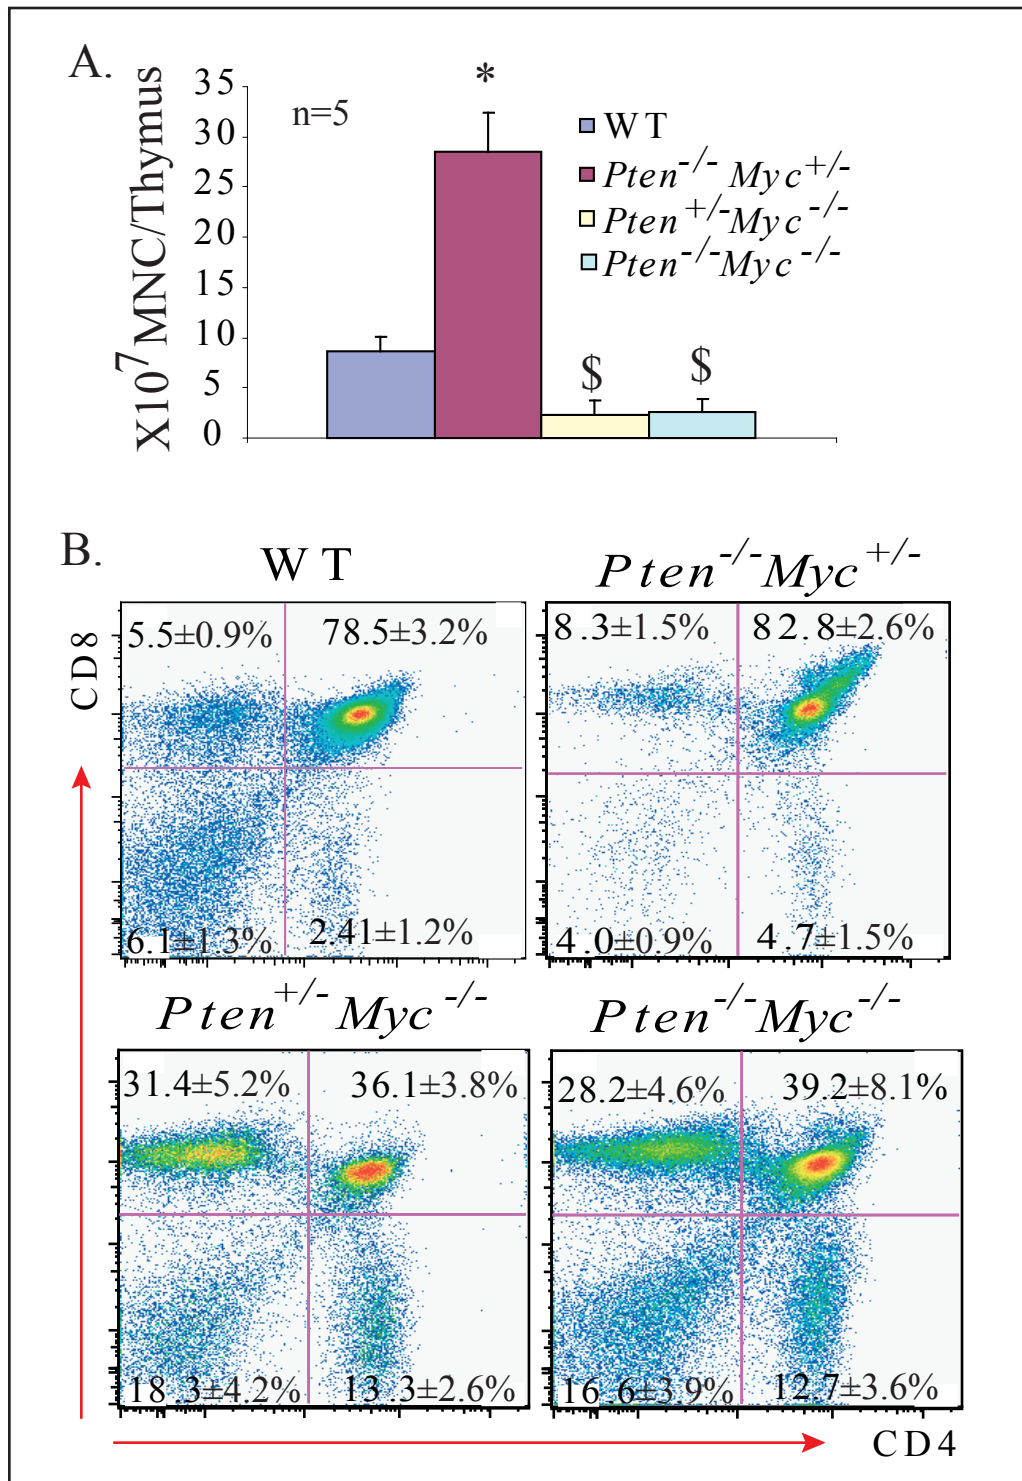

**Supplementary Data 8. Reduction of thymocyte numbers in thymus glands of *Pten*<sup>+/-</sup>*Myc*<sup>-/-</sup> and *Pten*<sup>-/-</sup>*Myc*<sup>-/-</sup> mice.** **A.** Total mononucleated cell numbers (MNCs) in thymus glands of WT, *Pten*<sup>-/-</sup>*Myc*<sup>+/-</sup>, *Pten*<sup>+/-</sup>*Myc*<sup>-/-</sup> and *Pten*<sup>-/-</sup>*Myc*<sup>-/-</sup> mice. **B.** CD4 and CD8 staining and flow cytometric analysis of thymocytes in the thymuses of mutant mice.
